# Supplementary material for: Mn-doped ZnO nanopowders prepared by sol–gel and microwave-assisted sol–gel methods and their photocatalytic properties
Source: publisher site journal article supplement (doi:10.3762/bjnano.15.104), 2024-10-28
Supplement: Additional file 1 [file 2190-4286-15-104-S1.pdf]

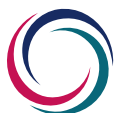

## Supporting Information

for

### **Mn-doped ZnO nanopowders prepared by sol–gel and microwave-assisted sol–gel methods and their photocatalytic properties**

Cristina Maria Vlădu█, Crina Anastasescu, Silviu Preda, Oana Catalina Mocioiu, Simona Petrescu, Jeanina Pandelescu, Dana Culita, Veronica Bratan, Ioan Balint and Maria Zaharescu

*Beilstein J. Nanotechnol.* **2024**, *15*, 1283–1296. doi:10.3762/bjnano.15.104

## Additional experimental data

Figure S1 displays the FTIR spectra of the sol-gel (SG) and microwave-assisted sol-gel (MW) samples after photocatalytic tests, alongside the spectrum of commercial oxalic acid for comparison. The spectra reveal the adsorption of oxalic acid on the surface of both SG and MW samples. The positions of the oxalic acid bands are shifted, indicating a chemical interaction with the zinc oxide.

In commercial oxalic acid, the asymmetric and symmetric stretching of the C=O bond in the COOH groups appear at  $1692\text{ cm}^{-1}$  and  $1443\text{ cm}^{-1}$ , respectively. However, in the spectra of the SG and MW samples, only the band corresponding to the asymmetric stretching of C=O is present at  $1647\text{ cm}^{-1}$ , shifted to a lower wavenumber. The asymmetric and symmetric stretching of the C-O bond in the COOH groups, originally at  $1250\text{ cm}^{-1}$  and  $1132\text{ cm}^{-1}$  in commercial oxalic acid, are shifted to  $1363\text{ cm}^{-1}$  and  $1318\text{ cm}^{-1}$ , respectively, in the SG and MW samples. This shift is attributed to the adsorption of oxalic acid on the Mn-doped ZnO surfaces through hydrogen bonding.

In the commercial oxalic acid spectrum, the O-H stretching bands appear at  $3525\text{ cm}^{-1}$  and  $3433\text{ cm}^{-1}$ , whereas the SG and MW sample spectra exhibit a single, asymmetric band at  $3383\text{ cm}^{-1}$ . This indicates a change in the structure. The observed spectral shifts of the OH-stretching vibrational transitions were recorded at  $142\text{ cm}^{-1}$  for both SG and MW samples.

In the spectrum of oxalic acid, small bands corresponding to the scissoring, rocking, and twisting vibrations of the C-C and C-OH bonds are observed below  $722\text{ cm}^{-1}$ . In the spectra of the SG and MW samples, these bands are shifted to higher wavenumbers, and their number increases, suggesting alterations in the molecular interactions.

In conclusion, after the photocatalytic tests, oxalic acid was detected in the spectra of both Mn-doped ZnO samples. It is important to note that the FTIR analysis in this study is qualitative and does not provide information on the quantity of acid deposited on the surfaces of the SG and MW samples separately.

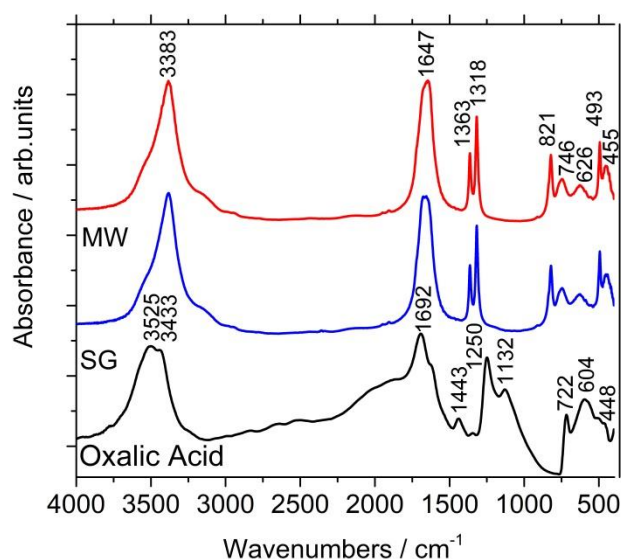

**Figure S1:** FTIR spectra of SG and MW samples after photocatalytic test compared to commercial oxalic acid.

Figure S2 shows the UV–vis spectra of pristine SG ZnO and MW ZnO samples. No visible light absorption (in line with literature data) or significant differences can be depicted for sol–gel ZnO and microwave ZnO. In addition,  $E_g$  values obtained by the Tauc method are larger ( $>3.1$  eV) than those of manganese-doped samples. Having in view the photocatalytic application of the synthesized materials, namely the oxalic acid degradation under solar light irradiation, the manganese-modified samples seem to have a higher applicative potential than pristine ZnO samples.

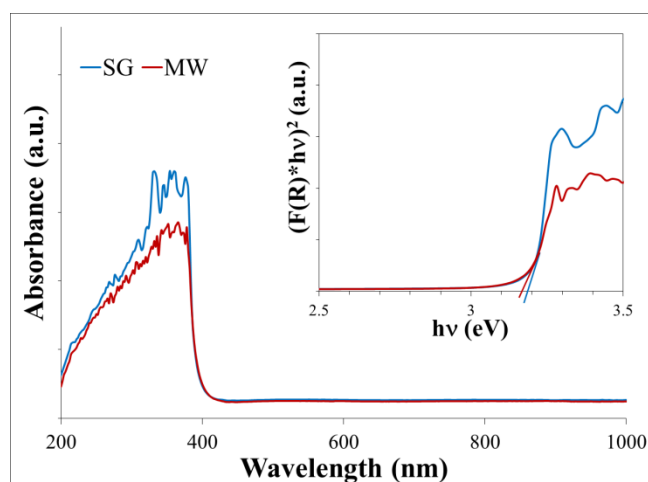

**Figure S2:** Comparative UV–vis spectra of SG ZnO and MW ZnO; the inset illustrates the Tauc representation for SG ZnO and MW ZnO samples.
